RETRACTION

# Retraction: Plexin-B1 Activates NF- $\kappa$ B and IL-8 to Promote a Pro-Angiogenic Response in Endothelial Cells

The *PLOS ONE* Editors

Following publication of this article [1], the *PLOS ONE* Editors received notification that an internal investigation conducted by the University of Maryland, Baltimore found that in Fig 2B, the histogram with the group data for I- $\kappa$ B super-repressor (SR) is a duplicate of the histogram in Fig 2A for the BAY11-7085-treated cells with a change of a label, calling into question the reliability of the results. A recommendation was made to retract the article in order to correct the scientific record and ensure its integrity.

In light of the findings and recommendation of the institutional investigation, the *PLOS ONE* Editors retract this article.

PP and JRB agreed with the retraction. Y-HY, HZ, and NOB could not be reached.

## Reference

1. Yang Y- H, Zhou H, Binmadi NO, Proia P, Basile JR (2011) Plexin-B1 Activates NF- $\kappa$ B and IL-8 to Promote a Pro-Angiogenic Response in Endothelial Cells. *PLoS ONE* 6(10): e25826. <https://doi.org/10.1371/journal.pone.0025826> PMID: 22028792

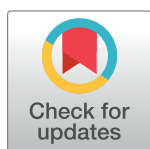

## OPEN ACCESS

**Citation:** The *PLOS ONE* Editors (2019) Retraction: Plexin-B1 Activates NF- $\kappa$ B and IL-8 to Promote a Pro-Angiogenic Response in Endothelial Cells. *PLoS ONE* 14(9): e0223295. <https://doi.org/10.1371/journal.pone.0223295>

**Published:** September 26, 2019

**Copyright:** © 2019 The PLOS ONE Editors. This is an open access article distributed under the terms of the [Creative Commons Attribution License](https://creativecommons.org/licenses/by/4.0/), which permits unrestricted use, distribution, and reproduction in any medium, provided the original author and source are credited.
